# Supplementary material for: Guest size effects on a robust structure of semiclathrate hydrates and their thermophysical properties
Source: Royal Society of Chemistry journal article supplement (doi:10.1039/d3cp04252a), 2023-12-18
Supplement: d3cp04252a2.pdf [file d3cp04252a2.pdf]

**Supplementary Information for:**

**Guest size effects on a robust structure of semiclathrate hydrates and  
their thermophysical properties**

Sanehiro Muromachi<sup>\*a</sup> and Satoshi Takeya<sup>b</sup>

*a. Energy Process Research Institute, National Institute of Advanced Industrial Science and Technology (AIST), 16-1 Onogawa, Tsukuba, 305-8569, Japan.*

*b. National Metrology Institute of Japan (NMIJ), National Institute of Advanced Industrial Science and Technology (AIST), Tsukuba Central 5, 1-1-1 Higashi, Tsukuba, 305-8565, Japan.*

\* Author to whom correspondence should be addressed. (S. M.)

E-mail: s-muromachi@aist.go.jp

Tell: +81-29-861-4287

Fax: +81-29-861-8706

Table 1. Melting temperature data for N3444Cl hydrate.

| $x$    | $U(x)$ | $w$   | $N_w$ | $T/K$  |
|--------|--------|-------|-------|--------|
| 0.0029 | 0.0015 | 0.040 | 349   | 272.46 |
| 0.0073 | 0.0016 | 0.097 | 137   | 271.88 |
| 0.0101 | 0.0016 | 0.130 | 97.7  | 271.07 |
| 0.0123 | 0.0017 | 0.154 | 80.4  | 270.97 |
| 0.0138 | 0.0017 | 0.170 | 71.5  | 271.74 |
| 0.0160 | 0.0017 | 0.192 | 61.5  | 272.73 |
| 0.0186 | 0.0018 | 0.217 | 52.8  | 273.80 |
| 0.0226 | 0.0018 | 0.253 | 43.3  | 274.68 |
| 0.0247 | 0.0019 | 0.271 | 39.5  | 275.19 |
| 0.0267 | 0.0019 | 0.287 | 36.5  | 275.30 |
| 0.0282 | 0.0019 | 0.299 | 34.4  | 275.50 |
| 0.0304 | 0.0020 | 0.315 | 31.9  | 275.58 |
| 0.0325 | 0.0020 | 0.330 | 29.8  | 275.77 |
| 0.0360 | 0.0021 | 0.354 | 26.8  | 275.77 |
| 0.0375 | 0.0021 | 0.364 | 25.6  | 275.67 |
| 0.0445 | 0.0022 | 0.405 | 21.5  | 275.18 |
| 0.0578 | 0.0025 | 0.473 | 16.3  | 273.69 |
| 0.0847 | 0.0029 | 0.576 | 10.8  | 269.38 |

Table 2. Melting temperature data for N4445Cl hydrate.

| $x$    | $U(x)$ | $w$   | $N_w$ | $T/K$  |
|--------|--------|-------|-------|--------|
| 0.0034 | 0.0013 | 0.052 | 297   | 273.91 |
| 0.0065 | 0.0014 | 0.096 | 152   | 277.27 |
| 0.0101 | 0.0015 | 0.142 | 98.2  | 279.03 |
| 0.0125 | 0.0015 | 0.171 | 78.8  | 279.94 |
| 0.0140 | 0.0015 | 0.187 | 70.6  | 280.35 |
| 0.0161 | 0.0016 | 0.210 | 61.1  | 280.70 |
| 0.0194 | 0.0016 | 0.242 | 50.7  | 281.02 |
| 0.0229 | 0.0017 | 0.275 | 42.7  | 281.54 |
| 0.0266 | 0.0018 | 0.307 | 36.6  | 281.65 |
| 0.0292 | 0.0018 | 0.328 | 33.3  | 281.82 |
| 0.0298 | 0.0018 | 0.332 | 32.6  | 281.82 |
| 0.0320 | 0.0019 | 0.349 | 30.3  | 281.82 |
| 0.0340 | 0.0019 | 0.363 | 28.4  | 281.82 |
| 0.0368 | 0.0019 | 0.382 | 26.2  | 281.65 |
| 0.0400 | 0.0020 | 0.403 | 24.0  | 281.56 |
| 0.0473 | 0.0021 | 0.446 | 20.2  | 281.15 |
| 0.0616 | 0.0024 | 0.515 | 15.2  | 279.94 |
| 0.0899 | 0.0028 | 0.615 | 10.1  | 276.89 |

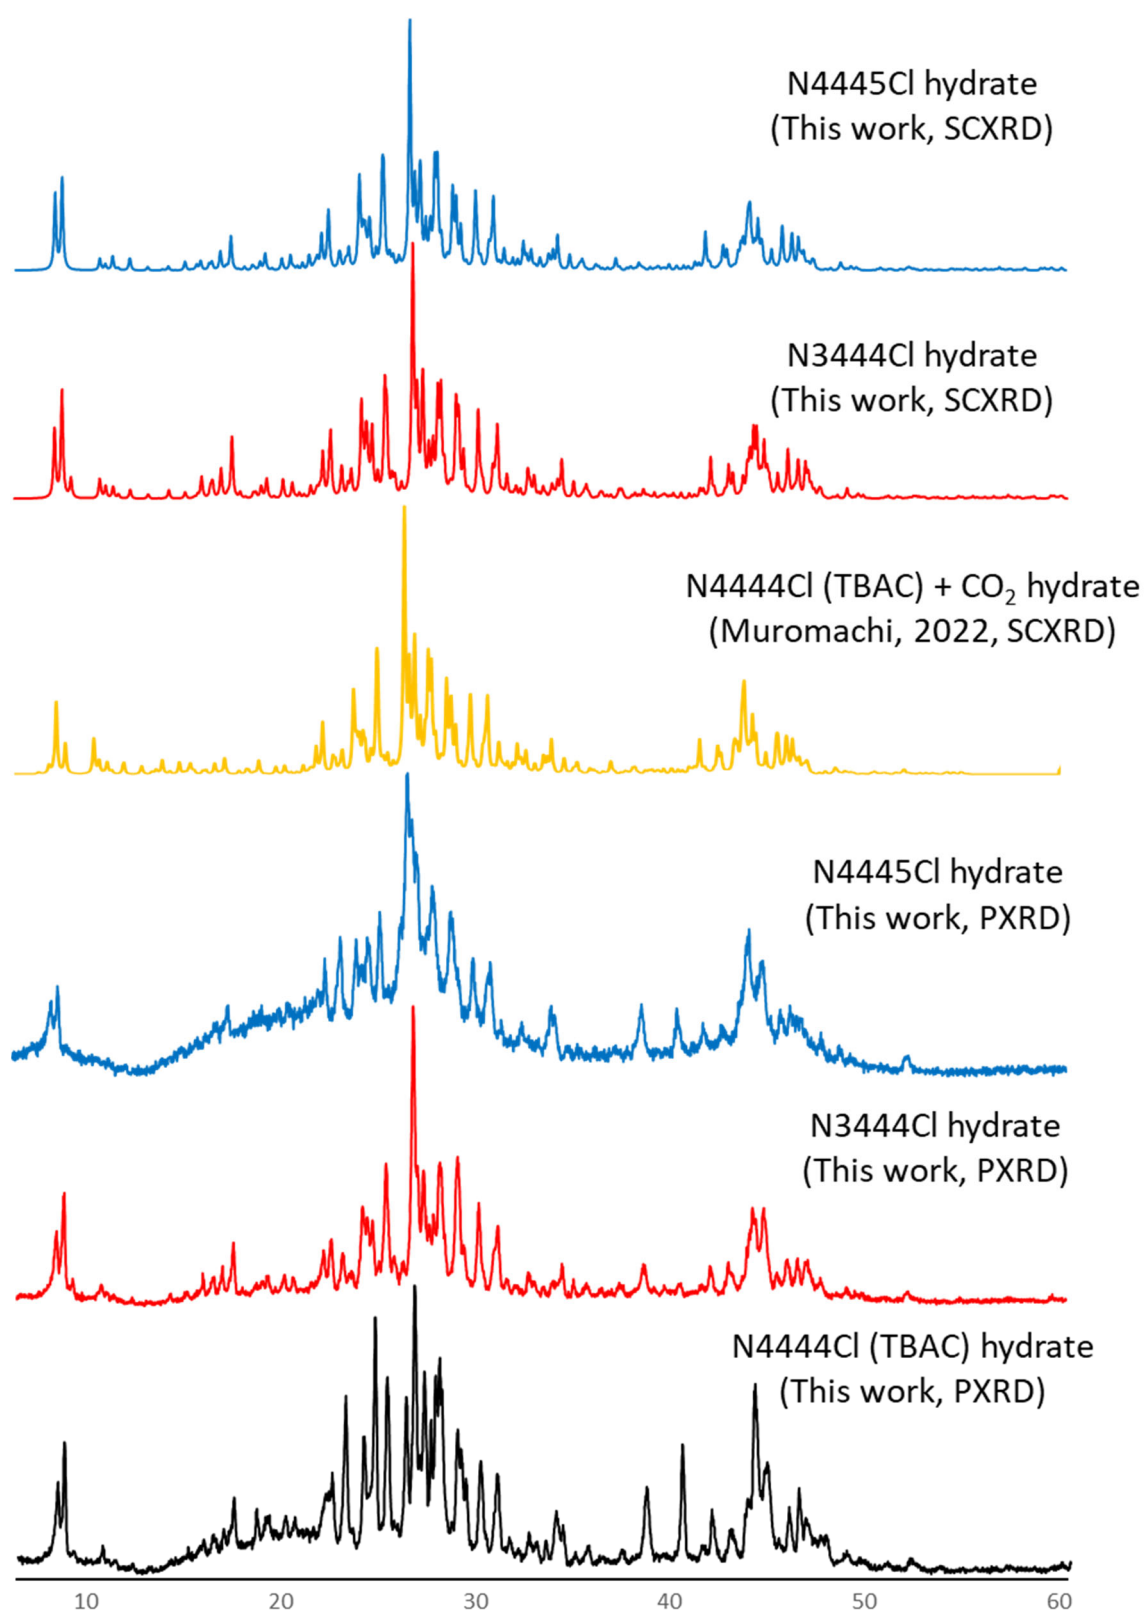

Fig. S1. Powder X-ray diffraction patterns for N4445Cl, N3444Cl and N4444Cl (TBAC) hydrates. Powder patterns generated from SCXRD data were together shown.

Table S3. Comparison of thermal properties between the semiclathrate hydrates which are identified to be the main three structures.

| Ionic guest              | Hydration number ( $N_w$ ) | Reference | Lattice      | Space group             | Reference | Jeffrey's type | Melting temperature /K | Reference | Fusion heat /kJ kg <sup>-1</sup> | Reference | Fusion heat /kJ mol <sup>-1</sup> (1 salt + $N_w$ of water) |
|--------------------------|----------------------------|-----------|--------------|-------------------------|-----------|----------------|------------------------|-----------|----------------------------------|-----------|-------------------------------------------------------------|
| TBA Acetate              | 25.8                       | 70        | cubic        | <i>Im3m</i>             | 70        | I              | 287.8                  | 70        | –                                | –         | –                                                           |
| TBA Butyrate             | 31.7                       | 70        | cubic        | <i>Pm/3n</i>            | 70        | I              | 289.9                  | 70        | 210                              | 70        | 189.1                                                       |
| TBAF                     | 29.7                       | 7         | cubic        | <i>I-43d</i>            | 7         | I              | 301.0                  | 7         | 222.9                            | 72        | 177.5                                                       |
| TBA Propionate           | 27                         | 8         | cubic        | <i>I-43d</i>            | 8         | I              | 290.0                  | –         | –                                | –         | –                                                           |
| TBA Propionate           | 26.8                       | 70        | cubic        | <i>I-43d</i>            | 70        | I              | 290.0                  | 8         | 196                              | 70        | 156.5                                                       |
| TBPOH                    | 29.6                       | 29        | cubic        | <i>I-43d</i>            | 29        | I              | 290.2                  | 29        | –                                | –         | –                                                           |
| N3444Cl                  | 26.8                       | This work | tetragonal   | <i>P4<sub>2</sub>/m</i> | This work | III            | 275.8                  | This work | 166.5                            | This work | 124.2                                                       |
| N4445Cl                  | 32.6                       | This work | tetragonal   | <i>P4<sub>2</sub>/m</i> | This work | III            | 281.8                  | This work | 173.3                            | This work | 152.3                                                       |
| TBA 2-Hydroxybutyrate    | 30                         | 54        | tetragonal   | <i>P-4</i>              | 54        | III            | 285.3                  | 54        | 177                              | 54        | 156.8                                                       |
| TBA Acetate              | 31                         | 70        | tetragonal   | <i>P4<sub>2</sub>/m</i> | 70        | III            | 288.0                  | 70        | 208                              | 70        | 178.9                                                       |
| TBAC                     | 32.2                       | 9         | tetragonal   | <i>P4<sub>2</sub>/m</i> | 9         | III            | 288.2                  | 9         | 208.7                            | 9         | 179.1                                                       |
| TBAC                     | 29.7                       | 9         | tetragonal   | <i>P4<sub>2</sub>/m</i> | 9         | III            | 288.3                  | 9         | 193                              | 9         | 156.9                                                       |
| TBAC                     | 24.5                       | 9         | tetragonal   | <i>P4<sub>2</sub>/m</i> | 9         | III            | 288.1                  | 9         | 177.8                            | 9         | 127.9                                                       |
| TBAF                     | 32.8                       | 27        | tetragonal   | <i>P4<sub>2</sub>/m</i> | 27        | III            | 298.1                  | 27        | –                                | –         | –                                                           |
| TBAF                     | 32.4                       | 72        | tetragonal   | <i>P4<sub>2</sub>/m</i> | 27        | III            | 300.4                  | 72        | 240.3                            | 72        | 203.1                                                       |
| TBA Glycolate            | 32                         | 56        | tetragonal   | <i>P-4</i>              | 56        | III            | 280.9                  | 56        | 161                              | 56        | 144                                                         |
| TBA Lactate              | 29.8                       | 53        | tetragonal   | <i>P-4</i>              | 53        | III            | 283.8                  | 53        | 191                              | 54        | 166                                                         |
| TBAOH                    | 31.3                       | 73        | tetragonal   | <i>P4<sub>2</sub>/m</i> | 74        | IV             | 300.5                  | 73        | 200.4                            | 34        | 164.8                                                       |
| TBA Propionate           | 31.6                       | 70        | tetragonal   | <i>P4<sub>2</sub>/m</i> | 70        | IV             | 290.5                  | 70        | 214                              | 70        | 189.4                                                       |
| N4445Br                  | 38                         | 61        | orthorhombic | <i>Pmma</i>             | 61        | IV             | 280.9                  | 61        | 223                              | 61        | 227.7                                                       |
| TBAB                     | 38                         | 5         | orthorhombic | <i>Pmma</i>             | 5         | IV             | –                      | –         | –                                | –         | –                                                           |
| TBAB                     | 38.1                       | 71        | orthorhombic | <i>Pmma</i>             | 71        | IV             | 282.7                  | 71        | 217.5                            | 71        | 219.4                                                       |
| TBA Propionate           | 37.4                       | 70        | orthorhombic | <i>P6/mmm</i>           | 70        | IV             | 288.0                  | 70        | 215.7                            | 70        | 213.4                                                       |
| TBPB                     | 38                         | 28        | orthorhombic | <i>Pmma</i>             | 28        | IV             | 282.7                  | 32        | 214                              | 62        | 215.3                                                       |
| Ni5i5i5i5 F <sup>a</sup> | 38                         | 75        | orthorhombic | <i>Cmmm</i>             | 75        | IV             | 304                    | 75        | –                                | –         | –                                                           |

<sup>a</sup> tetra-iso-pentylammonium fluoride.
